# Supplementary material
Source: Springer Nature journal article supplement (https://www.springermedizin.de/resource/supplementary/13046_2008_91_MOESM1_ESM.pdf/9661684)

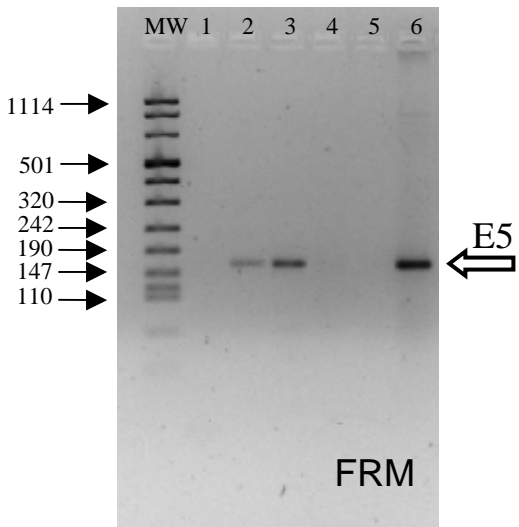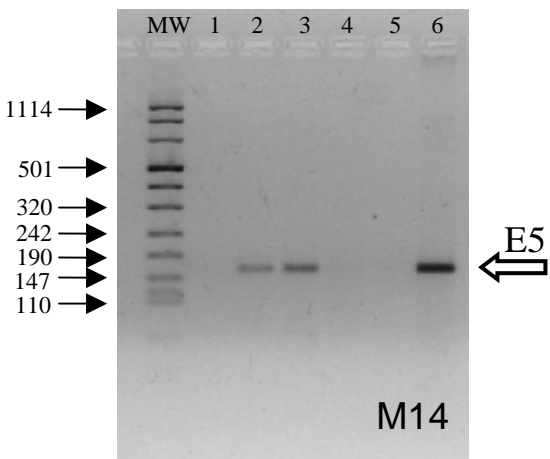

Supplement: MOESM1 [file 9661684]
